# Supplementary material for: An Approach to Quantifying the Interaction between Behavioral and Transmission Clusters
Source: MDPI journal article supplement (doi:10.3390/v14040784), 2022-04-10

## An approach to quantifying the interaction between behavioural and transmission clusters

Luisa Salazar-Vizcaya, *et.al*

**Figure S1.** Trends in condomless anal intercourse with non-steady partners among MSM across behavioral clusters [6]. Behavioral cluster BC0 comprises only patients without reported nsCAI.

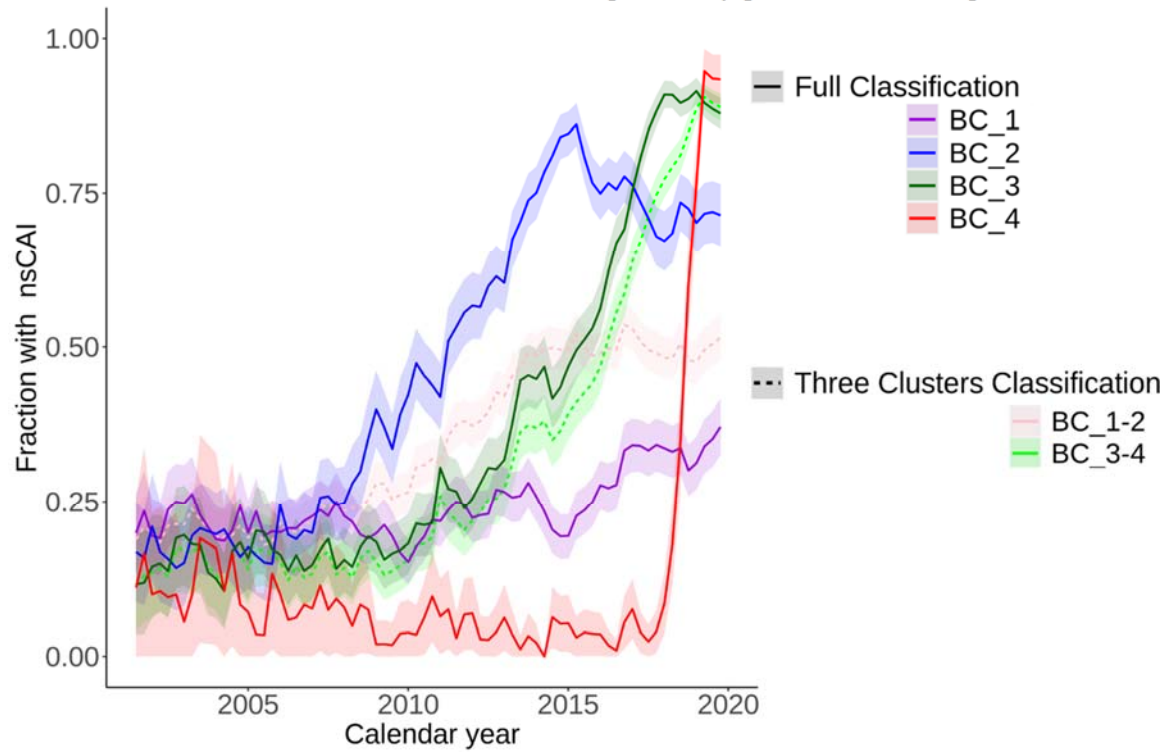

Supplement: s1 [file s1]
